# Supplementary material for: Population genomics provides insights into the evolution and adaptation to humans of the waterborne pathogen Mycobacterium kansasii
Source: PubMed Central journal article supplement (PMC8093194; doi:10.1038/s41467-021-22760-6), 2021-05-03
Supplement: 41467_2021_22760_MOESM1_ESM.pdf [file 41467_2021_22760_MOESM1_ESM.pdf]

## **Population genomics provides insights into the evolution and adaptation to humans of the waterborne pathogen *Mycobacterium kansasii***

Tao Luo\*, Peng Xu, Yangyi Zhang, Jessica L. Porter, Marwan Ghanem, Qingyun Liu, Yuan Jiang, Jing Li, Qing Miao, Bijie Hu, Benjamin P. Howden, Janet A. M. Fyfe, Maria Globan, Wencong He, Ping He, Yiting Wang, Houming Liu, Howard E. Takiff, Yanlin Zhao\*, Xinchun Chen\*, Qichao Pan\*, Marcel A. Behr\*, Timothy P. Stinear\*, Qian Gao\*

- **Supplementary Figures 1-16**
- **Supplementary Tables 1, 2**
- **Supplementary References**

### **\* Correspondence to:**

Qian Gao ([qiangao@fudan.edu.cn](mailto:qiangao@fudan.edu.cn))

Timothy P. Stinear ([tstinear@unimelb.edu.au](mailto:tstinear@unimelb.edu.au))

Marcel A. Behr ([marcel.behr@mcgill.ca](mailto:marcel.behr@mcgill.ca))

Qichao Pan ([panqichao@scdc.sh.cn](mailto:panqichao@scdc.sh.cn))

Xinchun Chen ([chenxinchun@szu.edu.cn](mailto:chenxinchun@szu.edu.cn))

Yanlin Zhao ([zhaoyl@chinacdc.cn](mailto:zhaoyl@chinacdc.cn))

Tao Luo ([taoluo@scu.edu.cn](mailto:taoluo@scu.edu.cn))

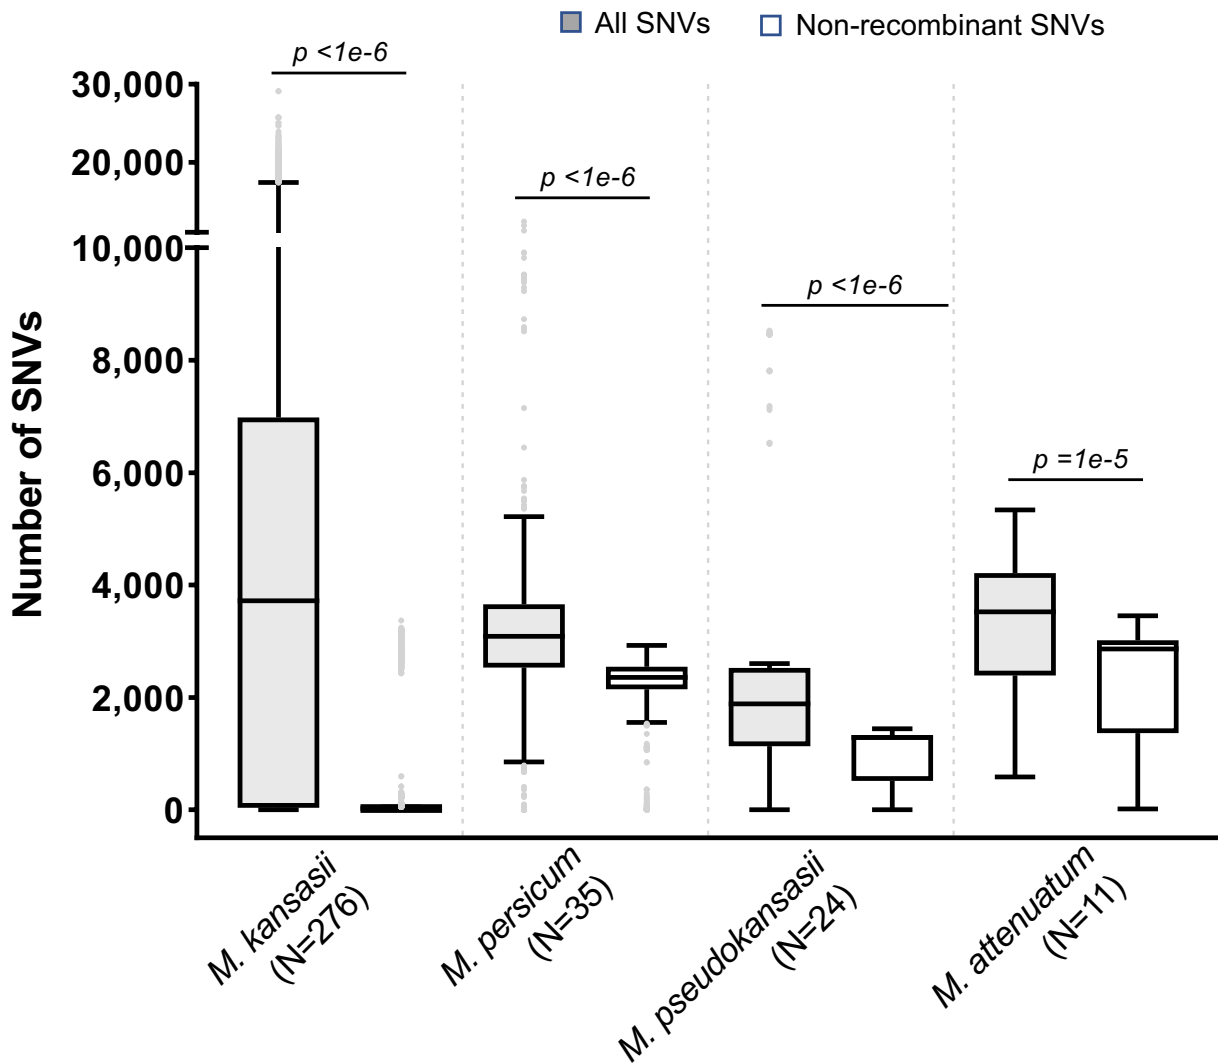

**Supplementary Fig. 1.** Pairwise difference of core genome single nucleotide variation (SNV) in the four major MKC species. All SNVs, SNVs from spontaneous mutations or recombinations; Non-recombinant SNVs, SNVs from spontaneous mutations. Boxes show the median and interquartile range (IQR) while whiskers extend to a maximum of  $1.5 \times$  IQR. Significance level between the distances of all and non-recombinant SNVs for each species is determined by the Mann Whitney test (two-sided). Source data are provided as a Source Data file.



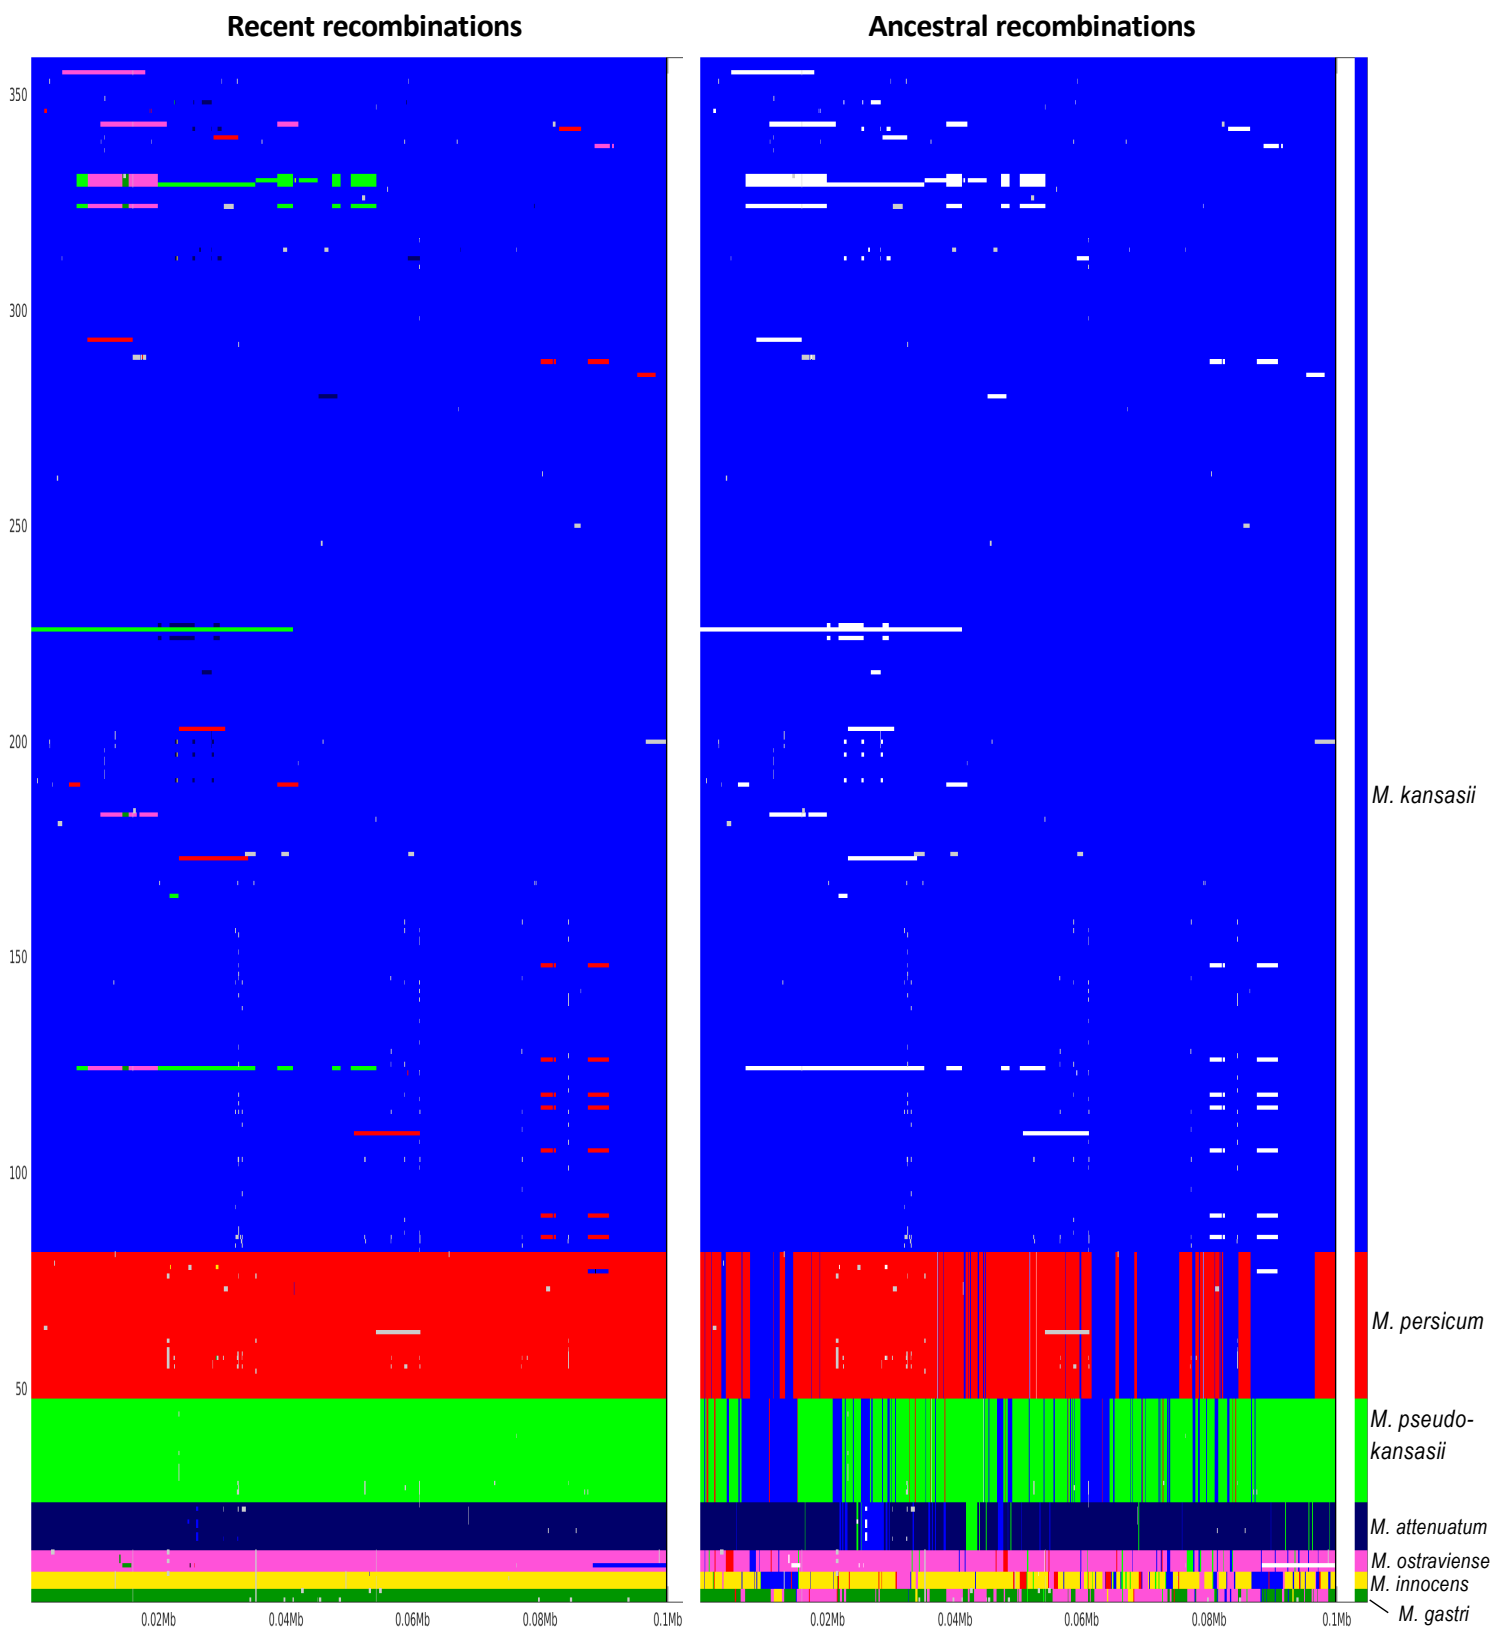

**Supplementary Fig. 3.** Genomic mosaics due to recent (left) and ancestral (right) recombinations between MKC species in a 100,000 bp region of the core genome. Each panel shows a multiple alignment of 358 sequences with colors representing ancestral sequence patterns of the MKC species as defined on the far left. The white lines in the right panel correspond to the recent recombinant fragments in the left.

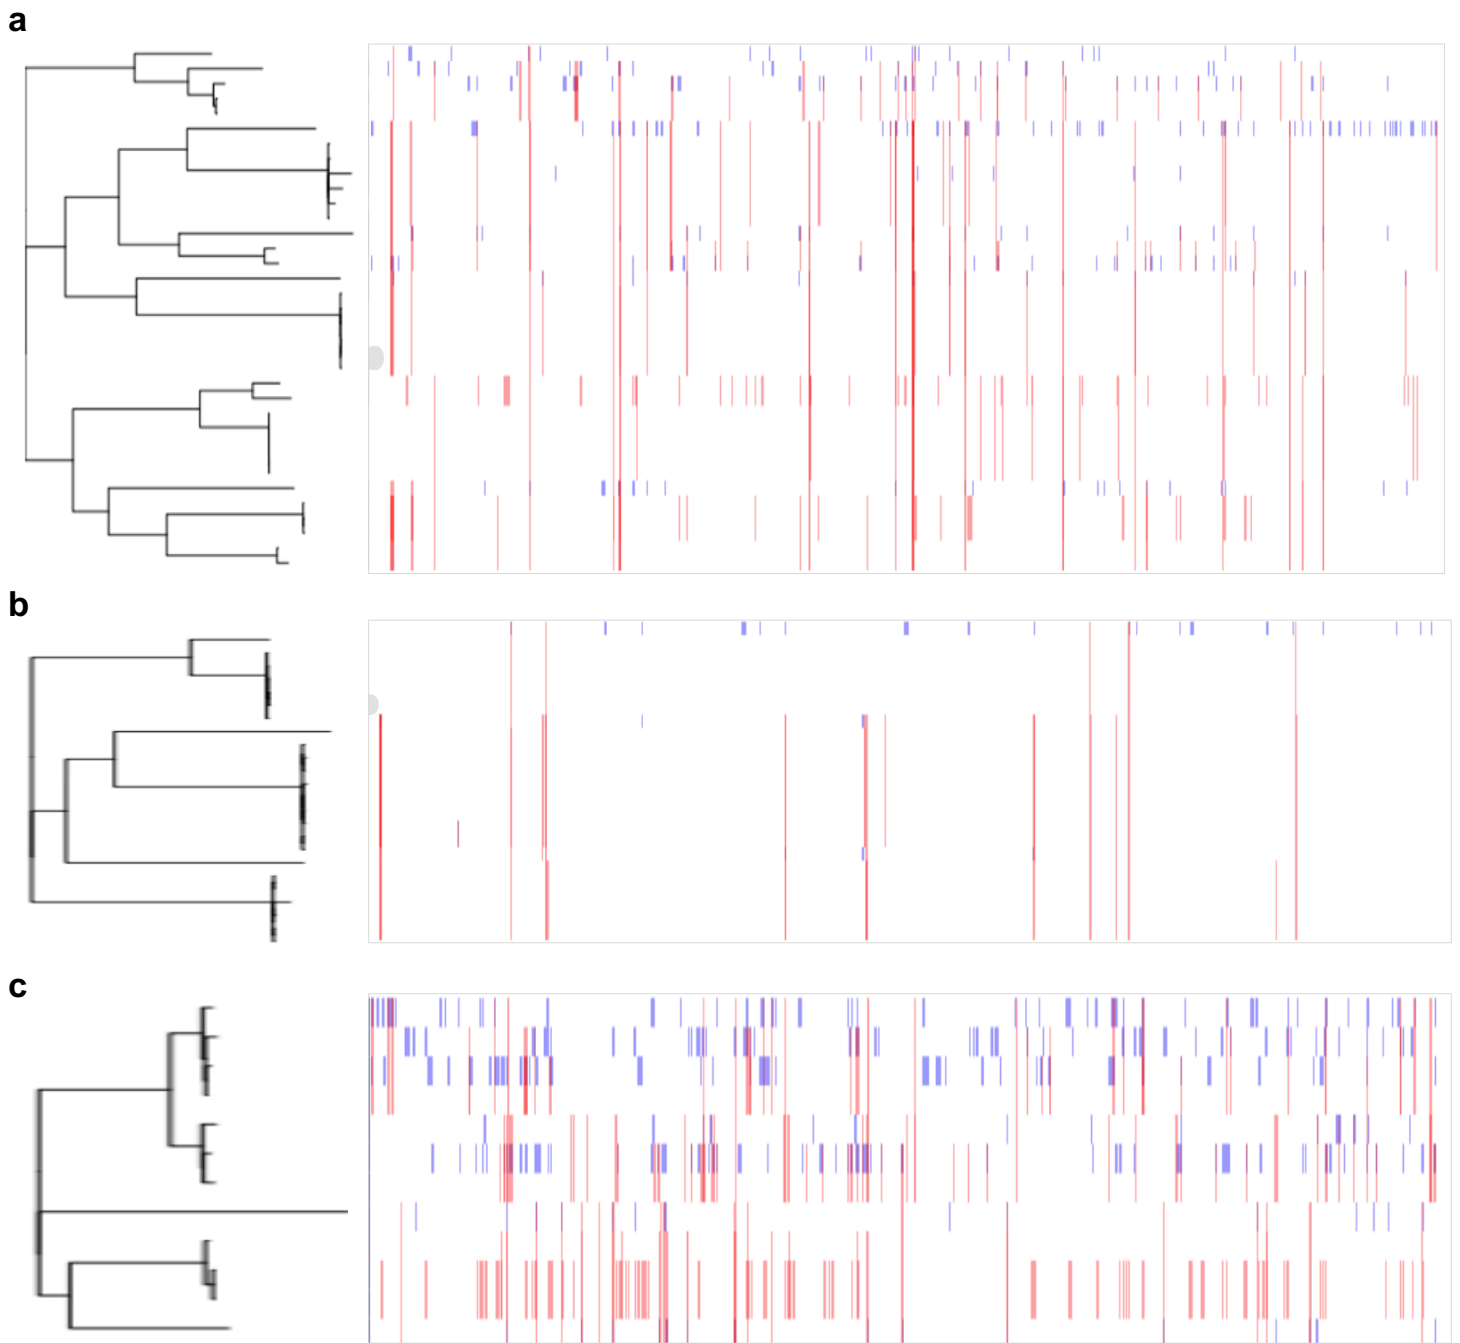

**Supplementary Fig. 4.** Genomic recombinations in *M. persicum* (a), *M. pseudokansasii* (b) and *M. attenuatum* (c) predicted by Gubbins. Left panel, maximum-likelihood phylogenies based on SNVs in non-recombinant genomic regions. Right panel, genomic recombinations. Blue blocks, unique recombinant segments; Red blocks, shared recombinant segments.

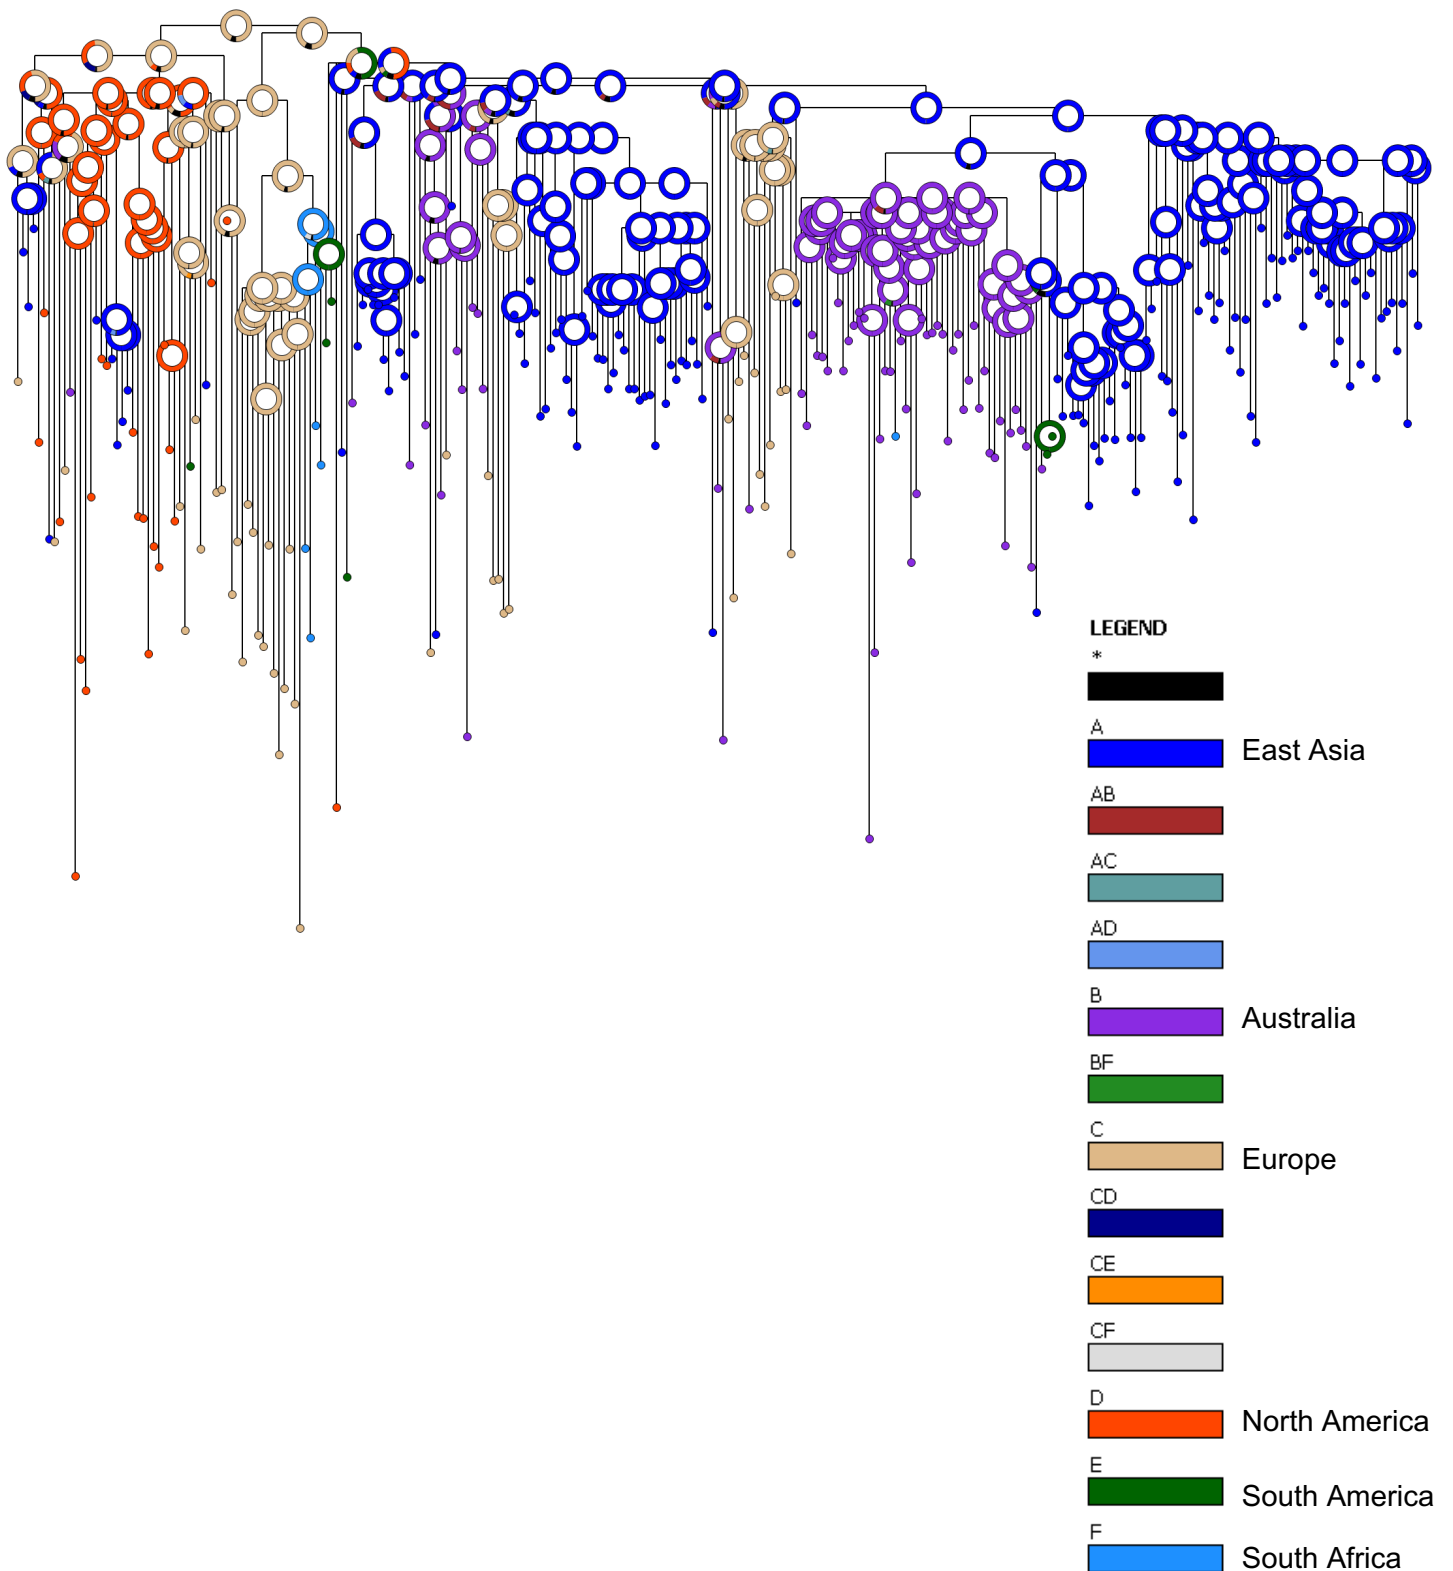

**Supplementary Fig. 5.** Phylogeographic analysis of the *M. kansasii* main cluster based on the Bayestrains MCMC model.

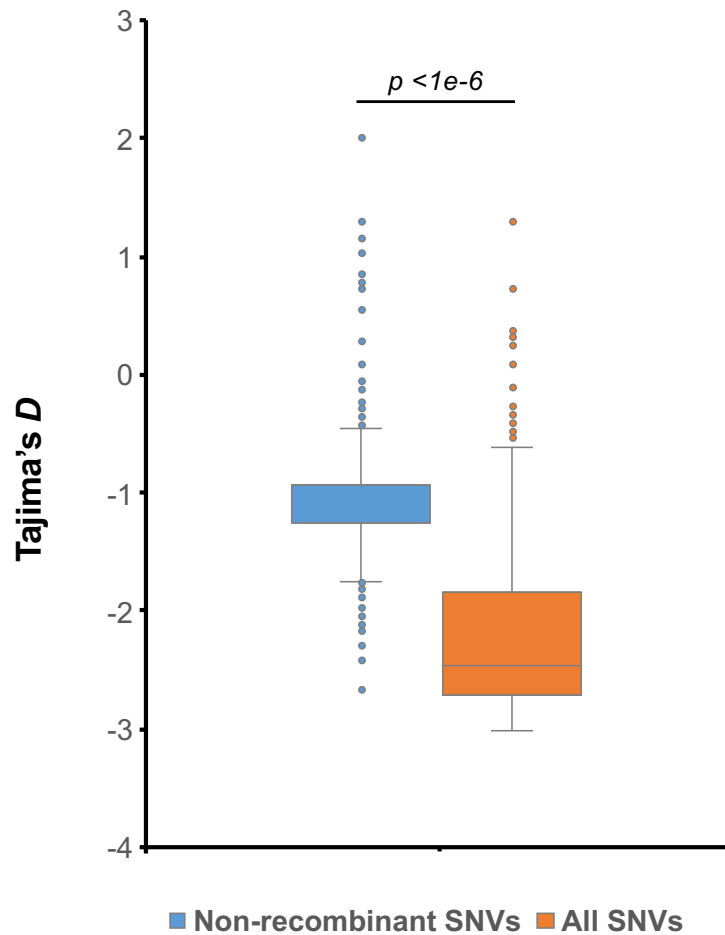

**Supplementary Fig. 6.** Tajima's *D* statistics of the *M. kansasii* main cluster based on all SNVs or Non-recombinant SNVs. Non-recombinant SNVs, values from 2020 genes; All SNVs, values from 4256 genes. Boxes show the median and interquartile range (IQR) while whiskers extend to a maximum of 1.5× IQR. Significance level is determined by the Mann Whitney test (two-sided). Source data are provided as a Source Data file.

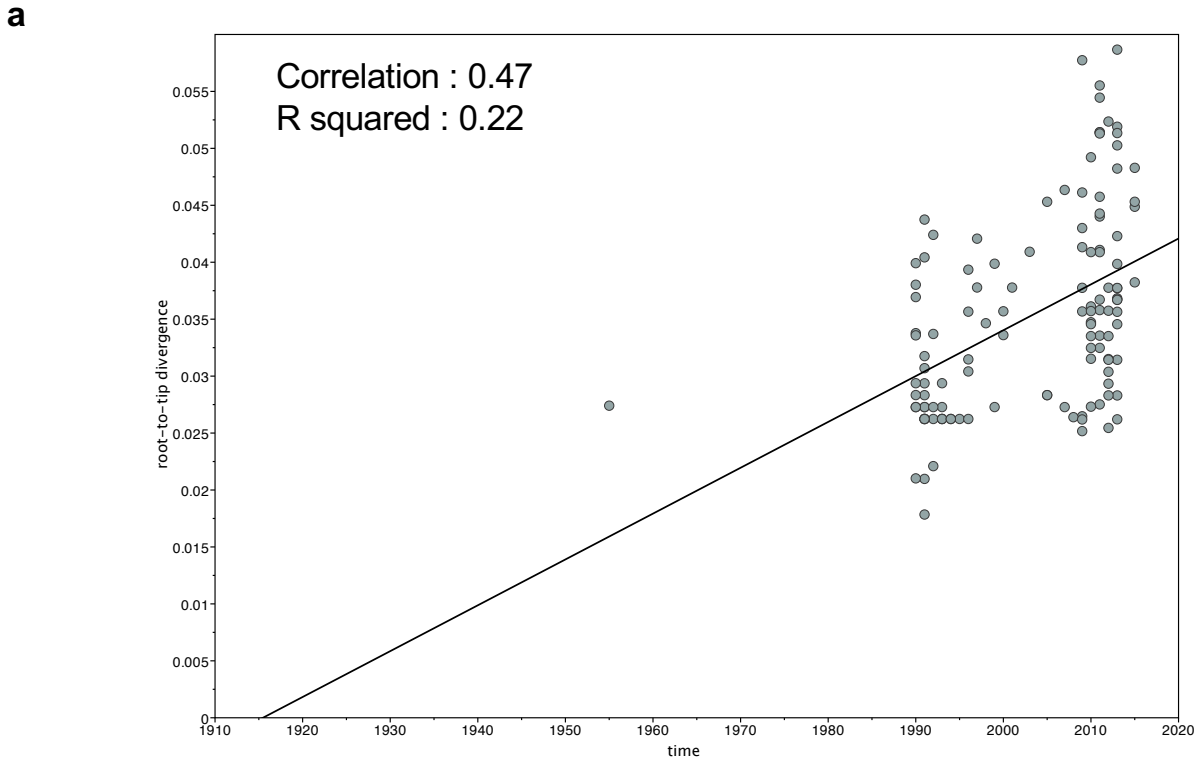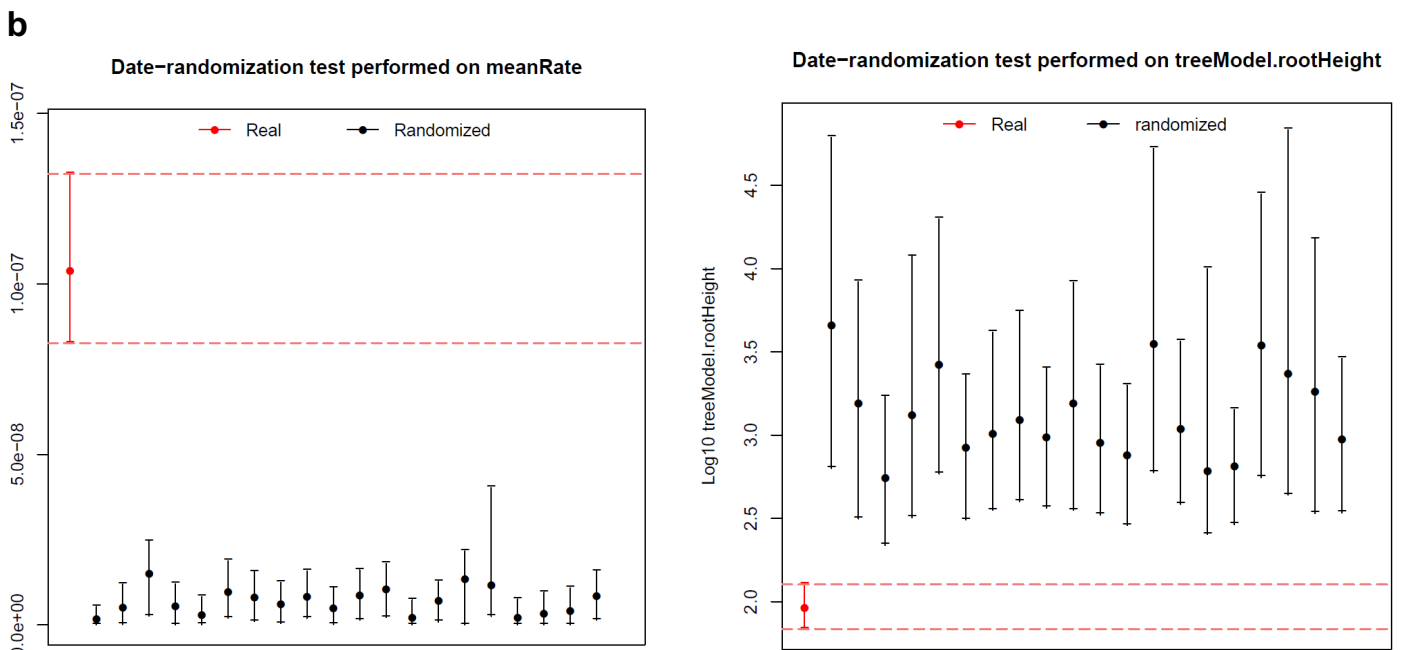

**Supplementary Fig. 7.** Root-to-tip analysis (**a**) and date-randomization test (**b**) performed on 121 MKMC isolates. For the root-to-tip analysis, a positive correlation (0.47) between genetic divergence and sampling time indicates that the data set is suitable for phylogenetic molecular clock analysis. Source data are provided as a Source Data file. In the date-randomization tests, the 95% confidence intervals (CI) for the estimates of the clock rate (left graph) and root height (right graph) of the observed data (in red) do not overlap with the confidence intervals for the estimates obtained from the randomized sets (in black, 20 independent runs), indicating strong temporal signals. Data are presented as mean and 95% CI.



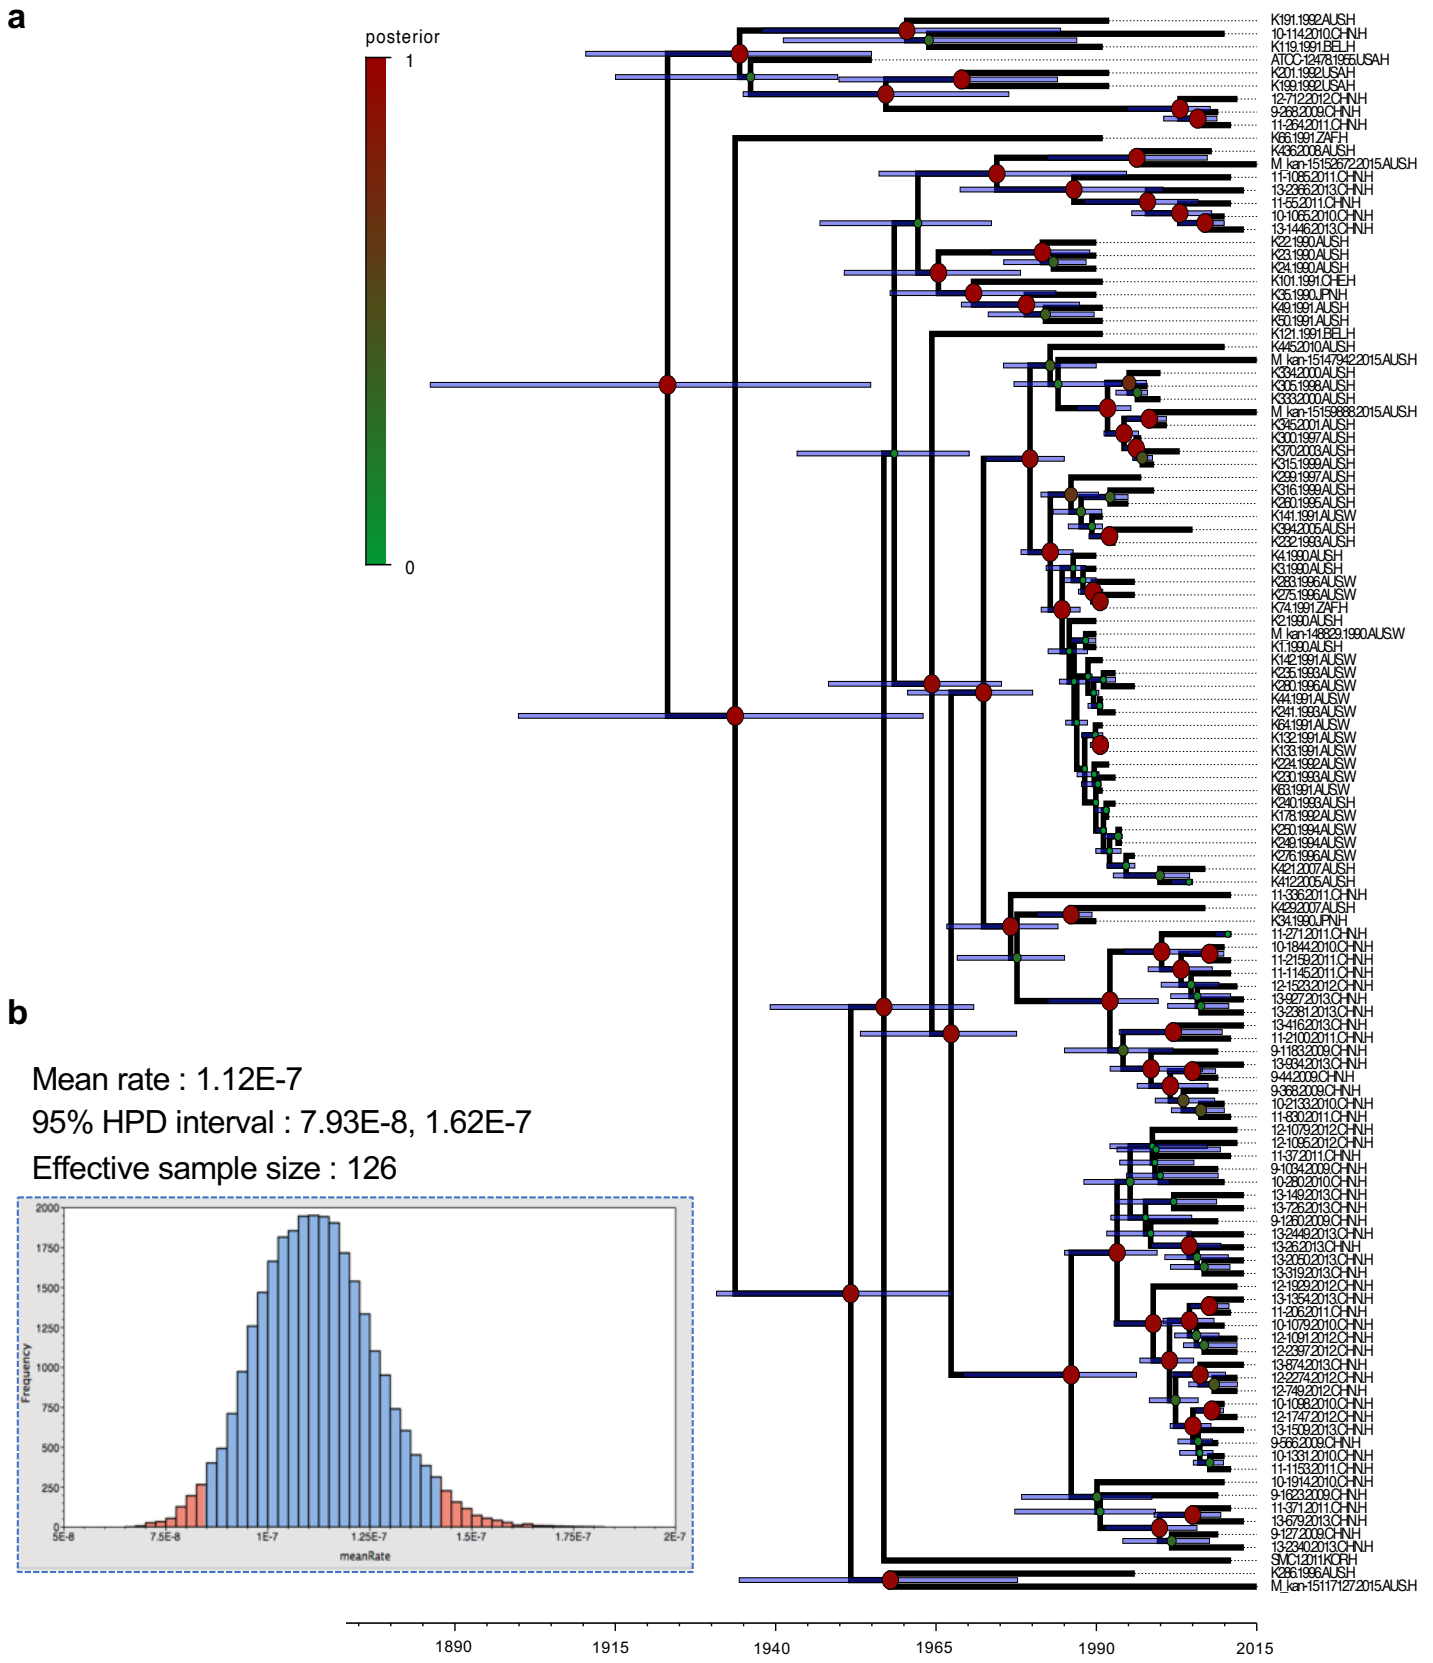

**Supplementary Fig. 8.** Bayesian evolutionary analysis of 121 MKMC isolates. **a** Maximum clade credibility tree of the 121 isolates. Node bars indicate 95% CI of height. **b** Posterior distribution for the evolutionary rate.

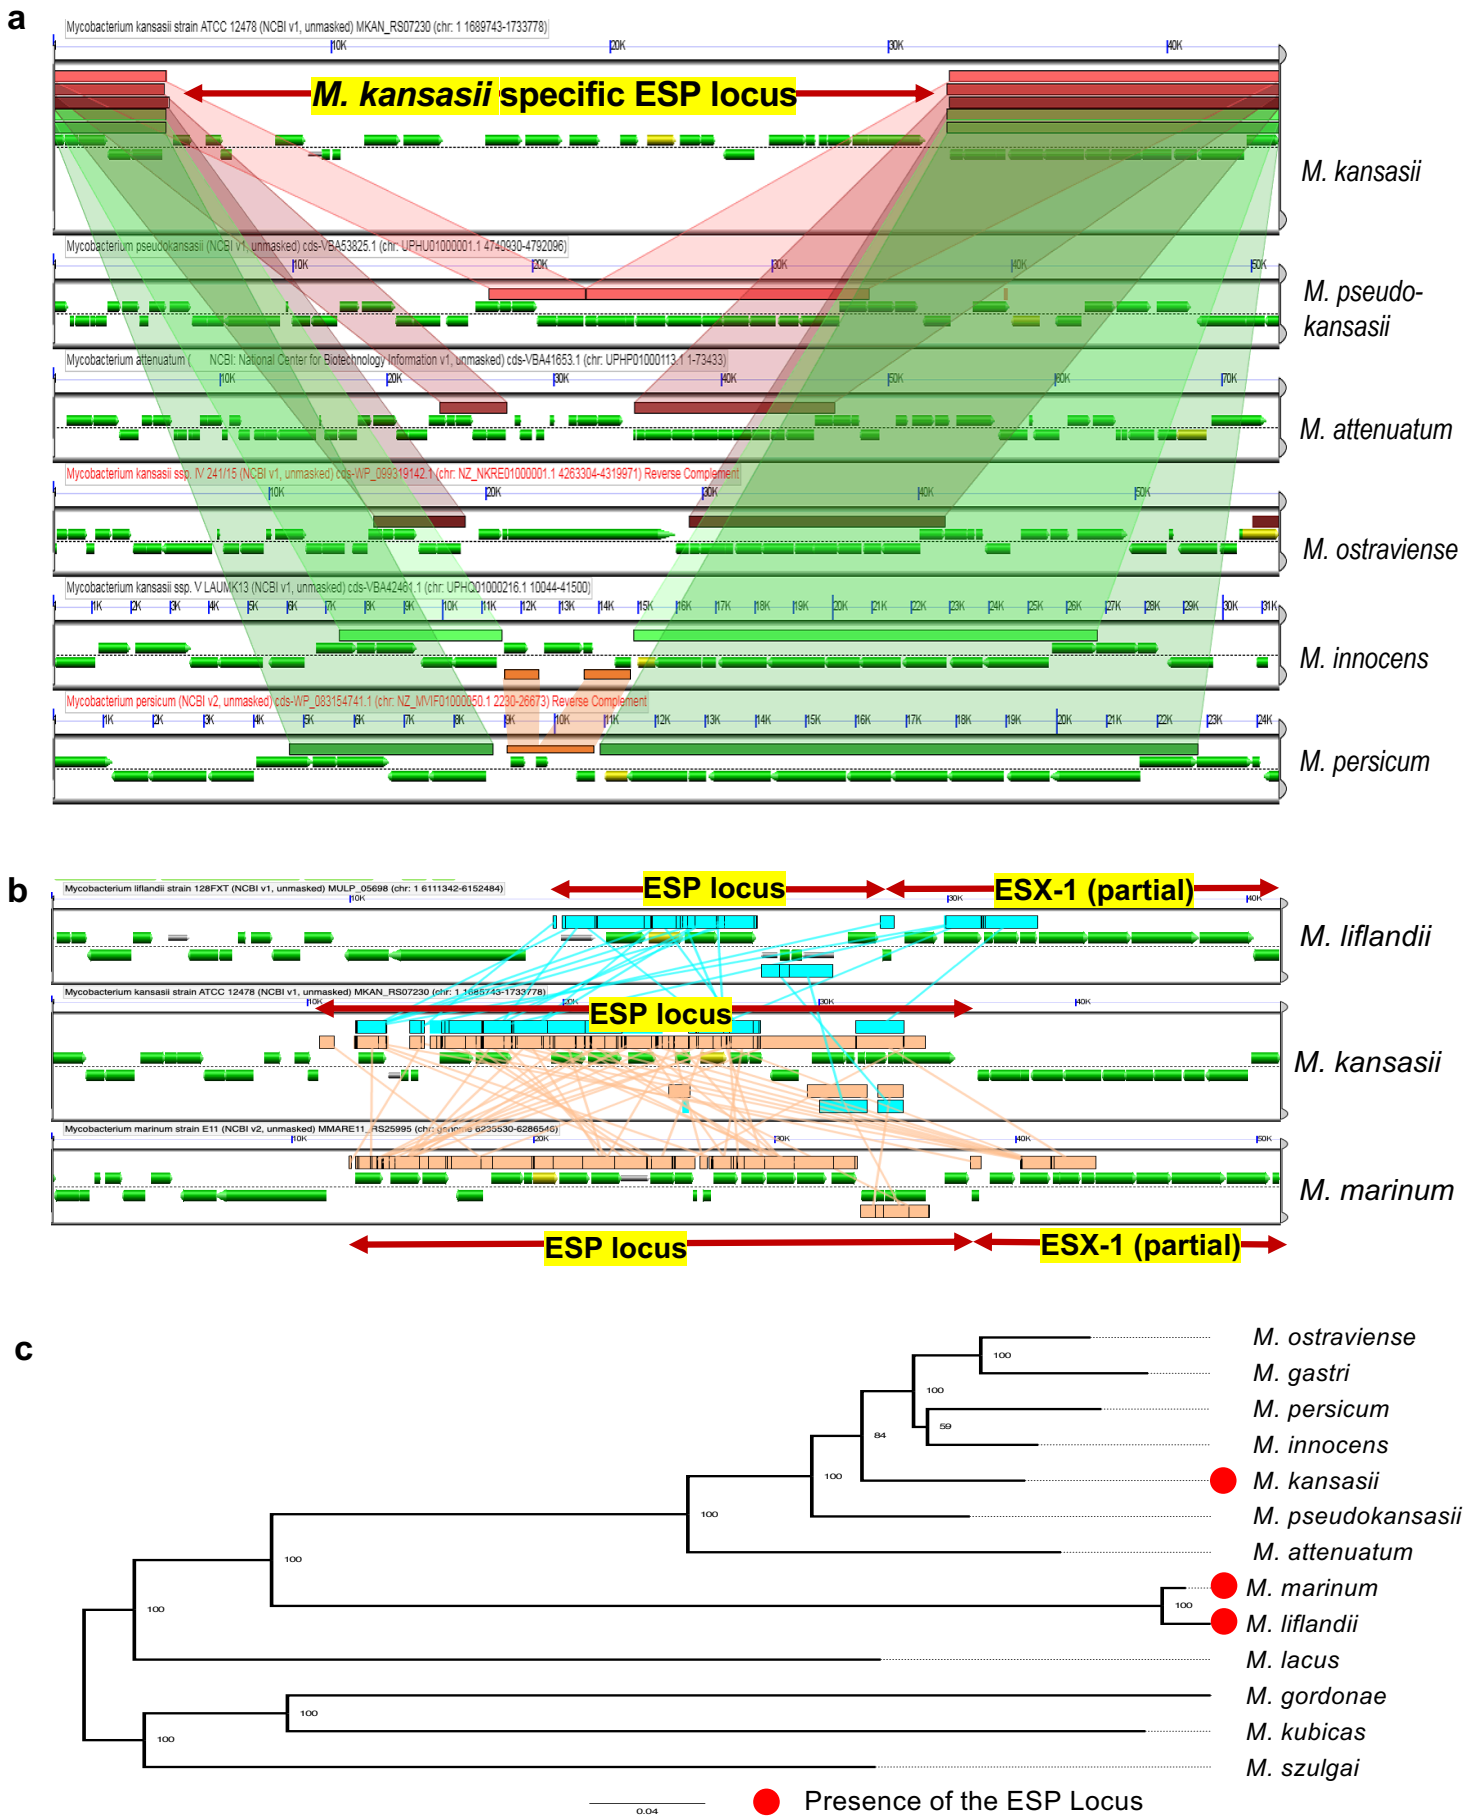

**Supplementary Fig. 9. a** Synteny map for the ESP locus in the MKC species. **b** Synteny map for the *M. kansasii* specific ESP locus in *M. marinum* and *M. liflandii*. **c** Maximum likelihood phylogeny of the MKC and close related mycobacterium species. Filled red circles indicate presence of the ESP locus.

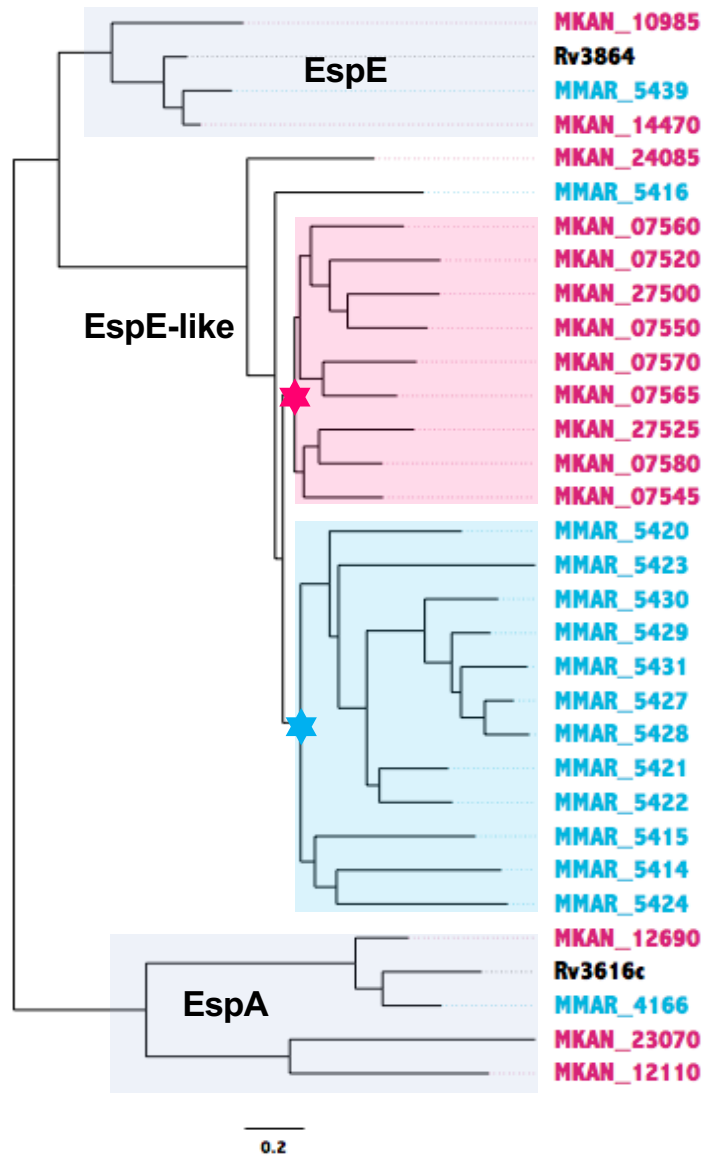

**Supplementary Fig. 10.** Genetic relationship (Neighbor-Joining phylogeny) between EspE, EspE-like and EspA orthologs of *M. knasaii* (in red), *M. marinum* (in blue) and *M. tuberculosis* (in black). The stars represent potential gene expansions of *espE*-like genes in *M. knasaii* and *M. marinum*.

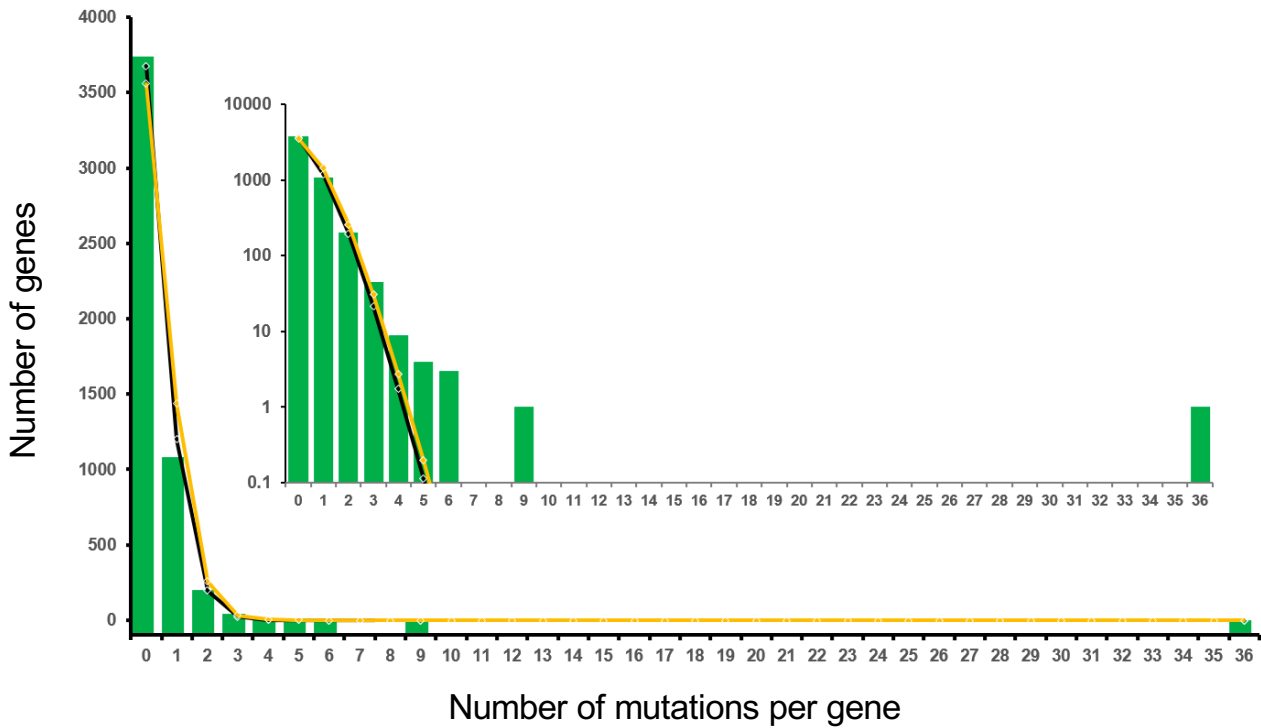

**Supplementary Fig. 11.** Distribution of number of non-recombinant mutations (SNVs and short indels) per genes. Lines indicate 95% confidence interval of mean predicted values under a Poisson distribution fitted to the data shown in green. Inset shows gene count on a log scale to better show deviations from the Poisson model at high numbers of mutations per gene. Source data are provided as a Source Data file.

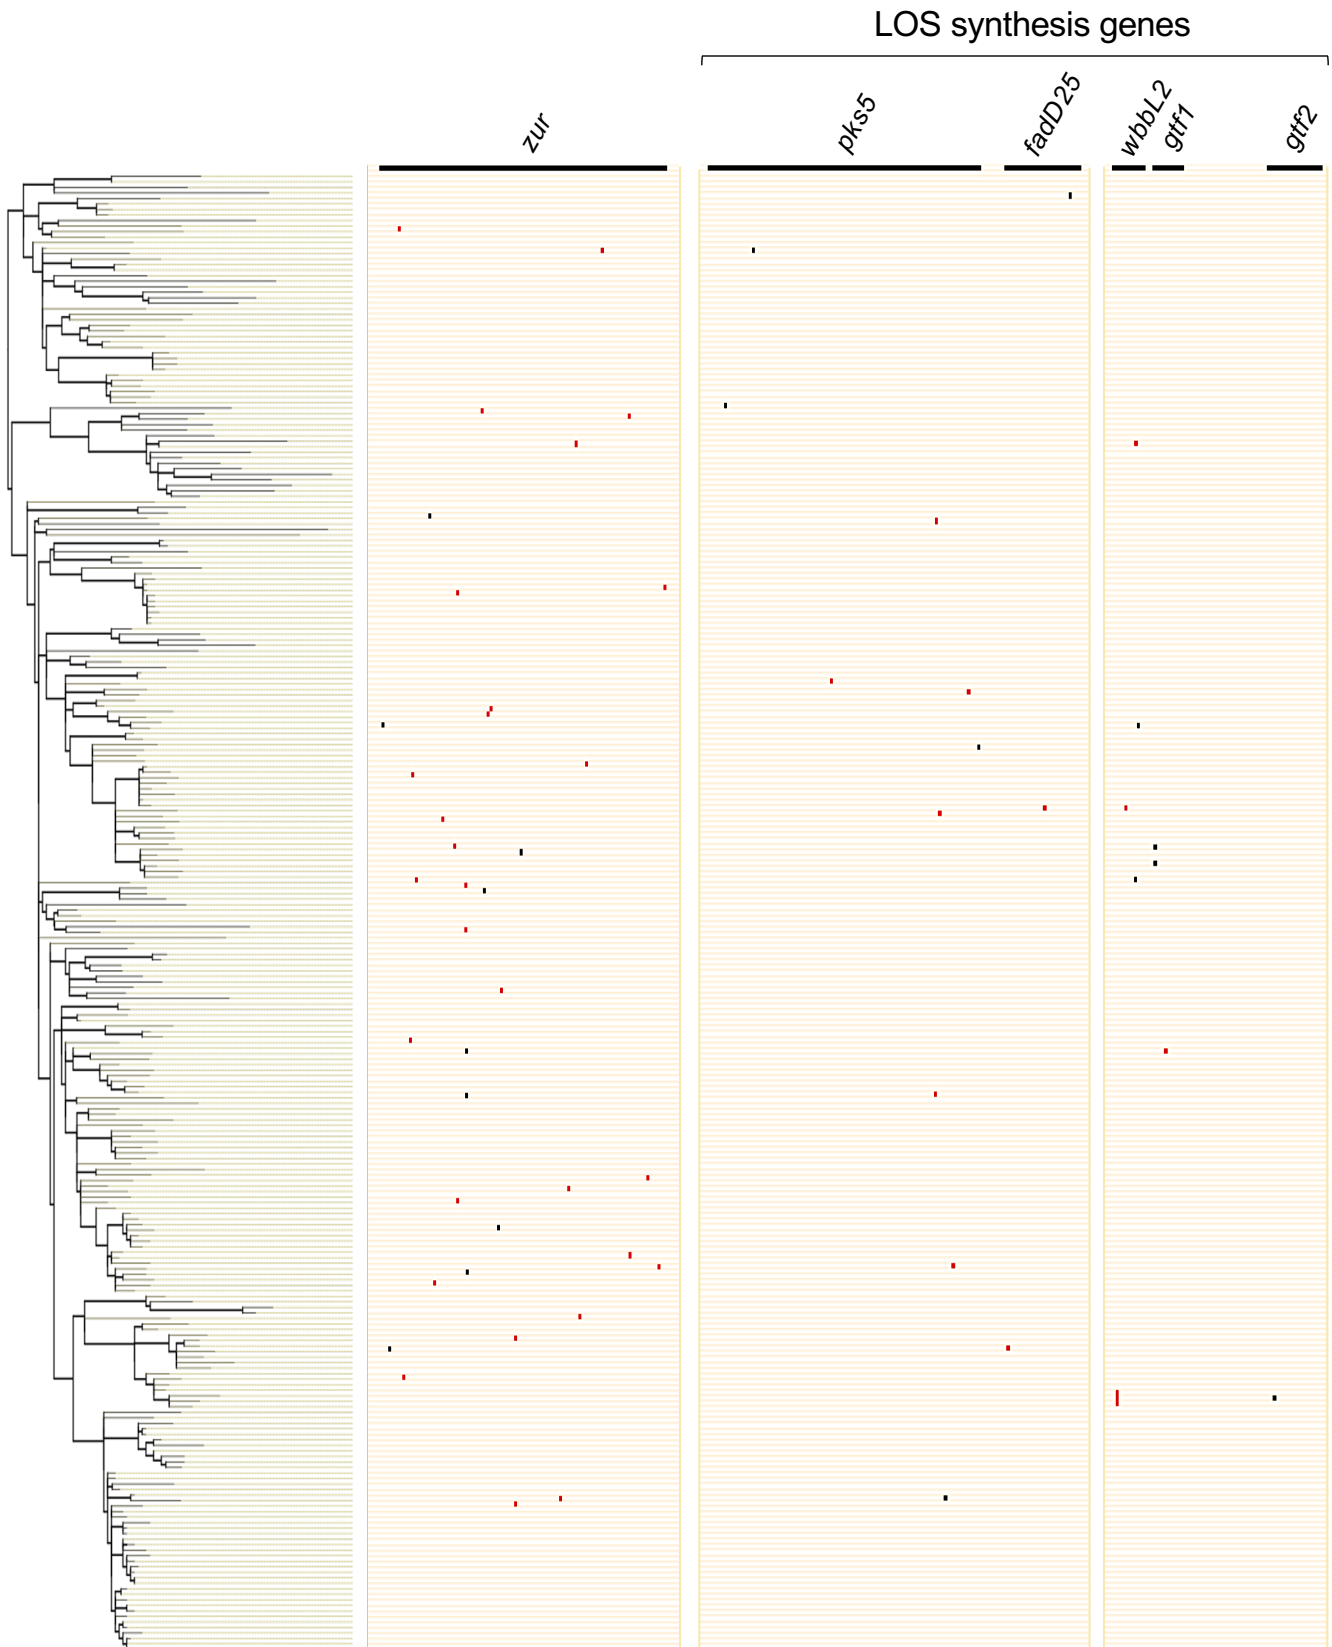

**Supplementary Fig. 12.** Distribution of non-recombinant homozygous mutations in *zur* and LOS synthesis genes in the MKMC strains and their emergences along the phylogeny. Red, single nucleotide variant; black, insertion or deletion.



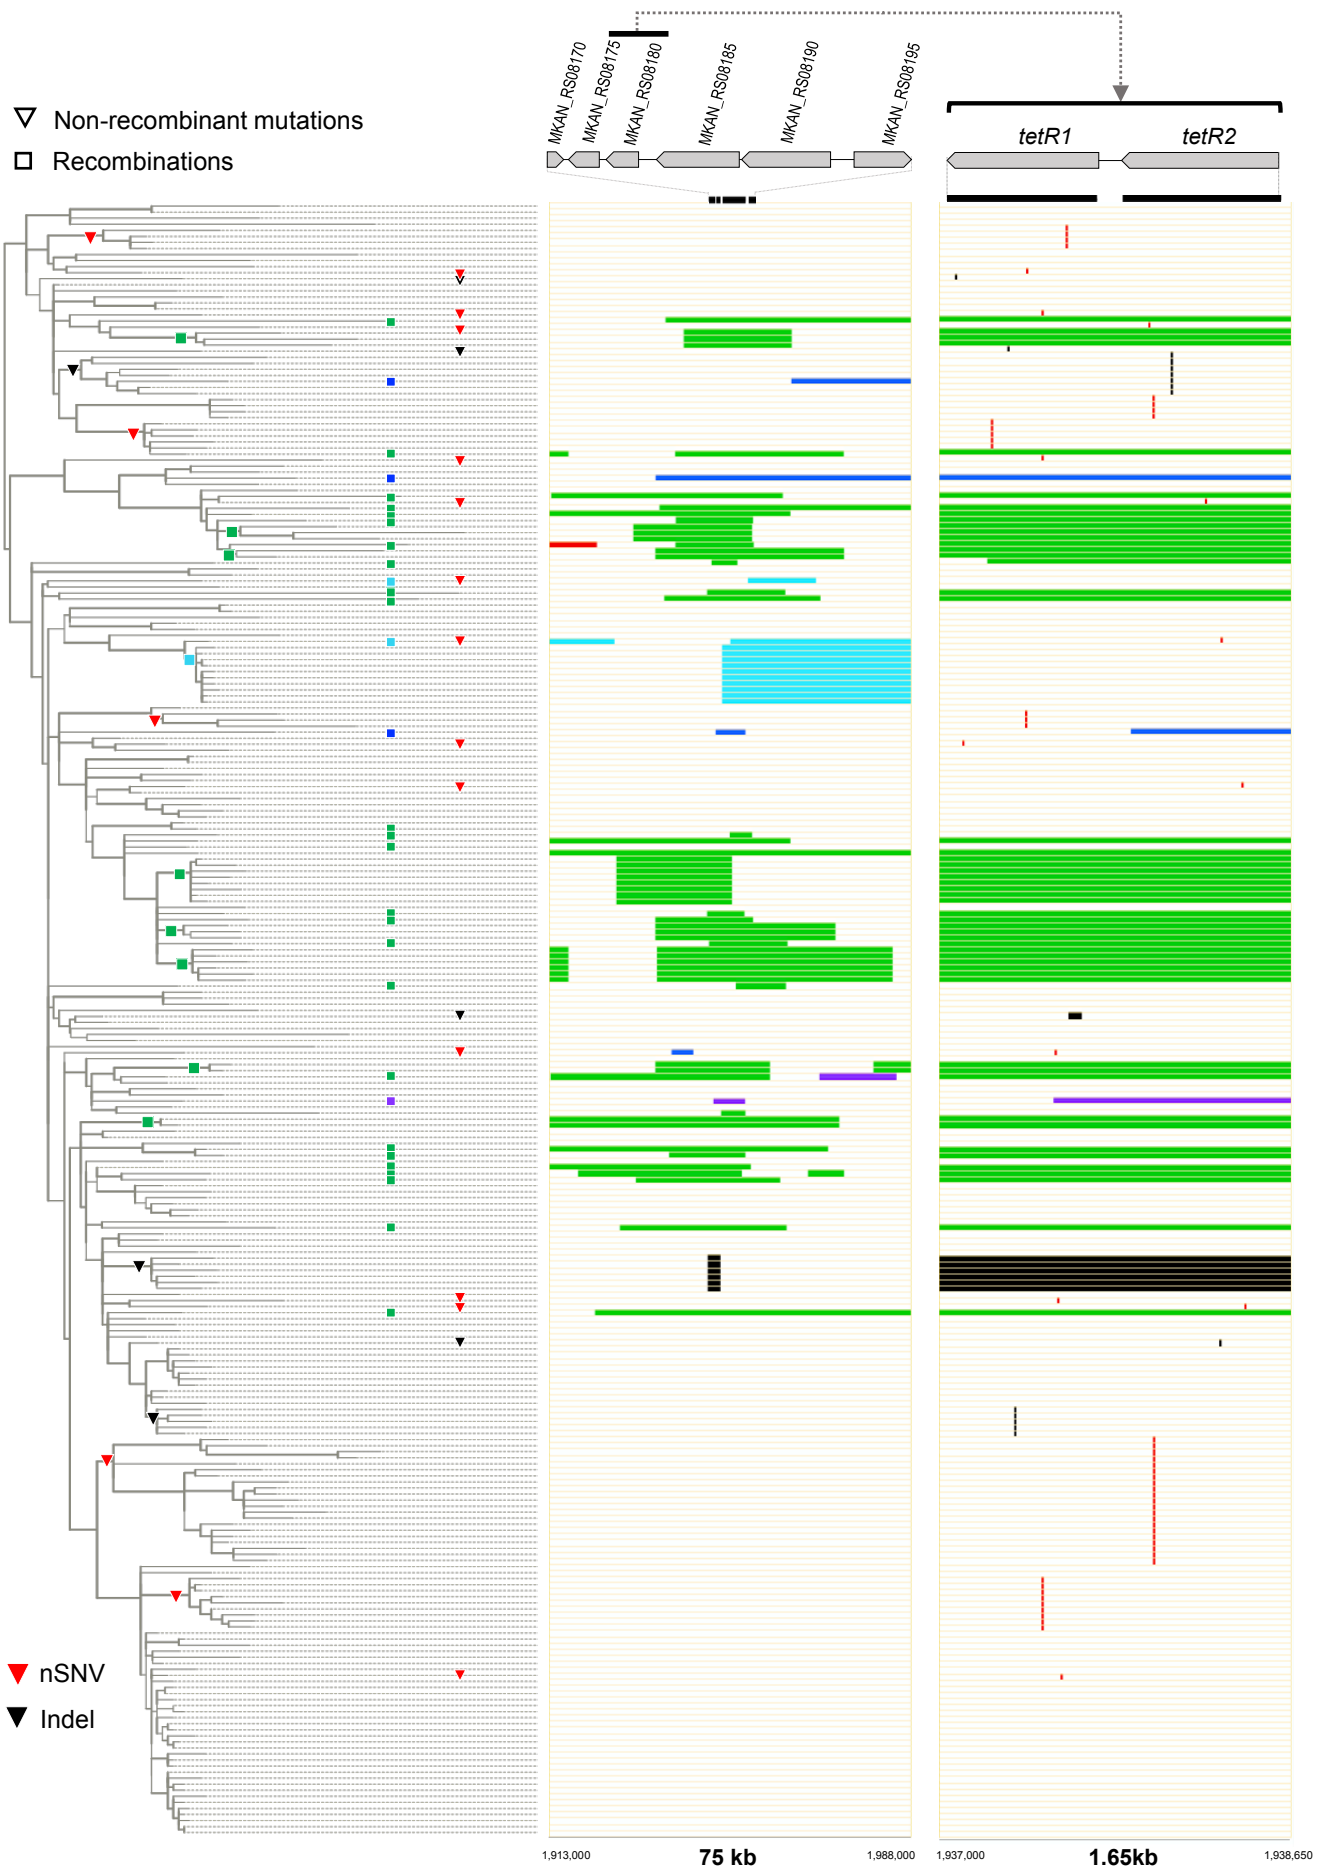

**Supplementary Fig. 14.** Recombinant fragments and non-recombinant mutations in *tetR1/2* and flanking regions, and mapping of the recombination/mutation events to the maximum-likelihood phylogeny based on the maximum parsimony algorithm. Recombinant fragments are colored according to their donor species as indicated in Figure 2a. Red, nonsynonymous single nucleotide variant (nSNV); black, insertion or deletion (Indel).

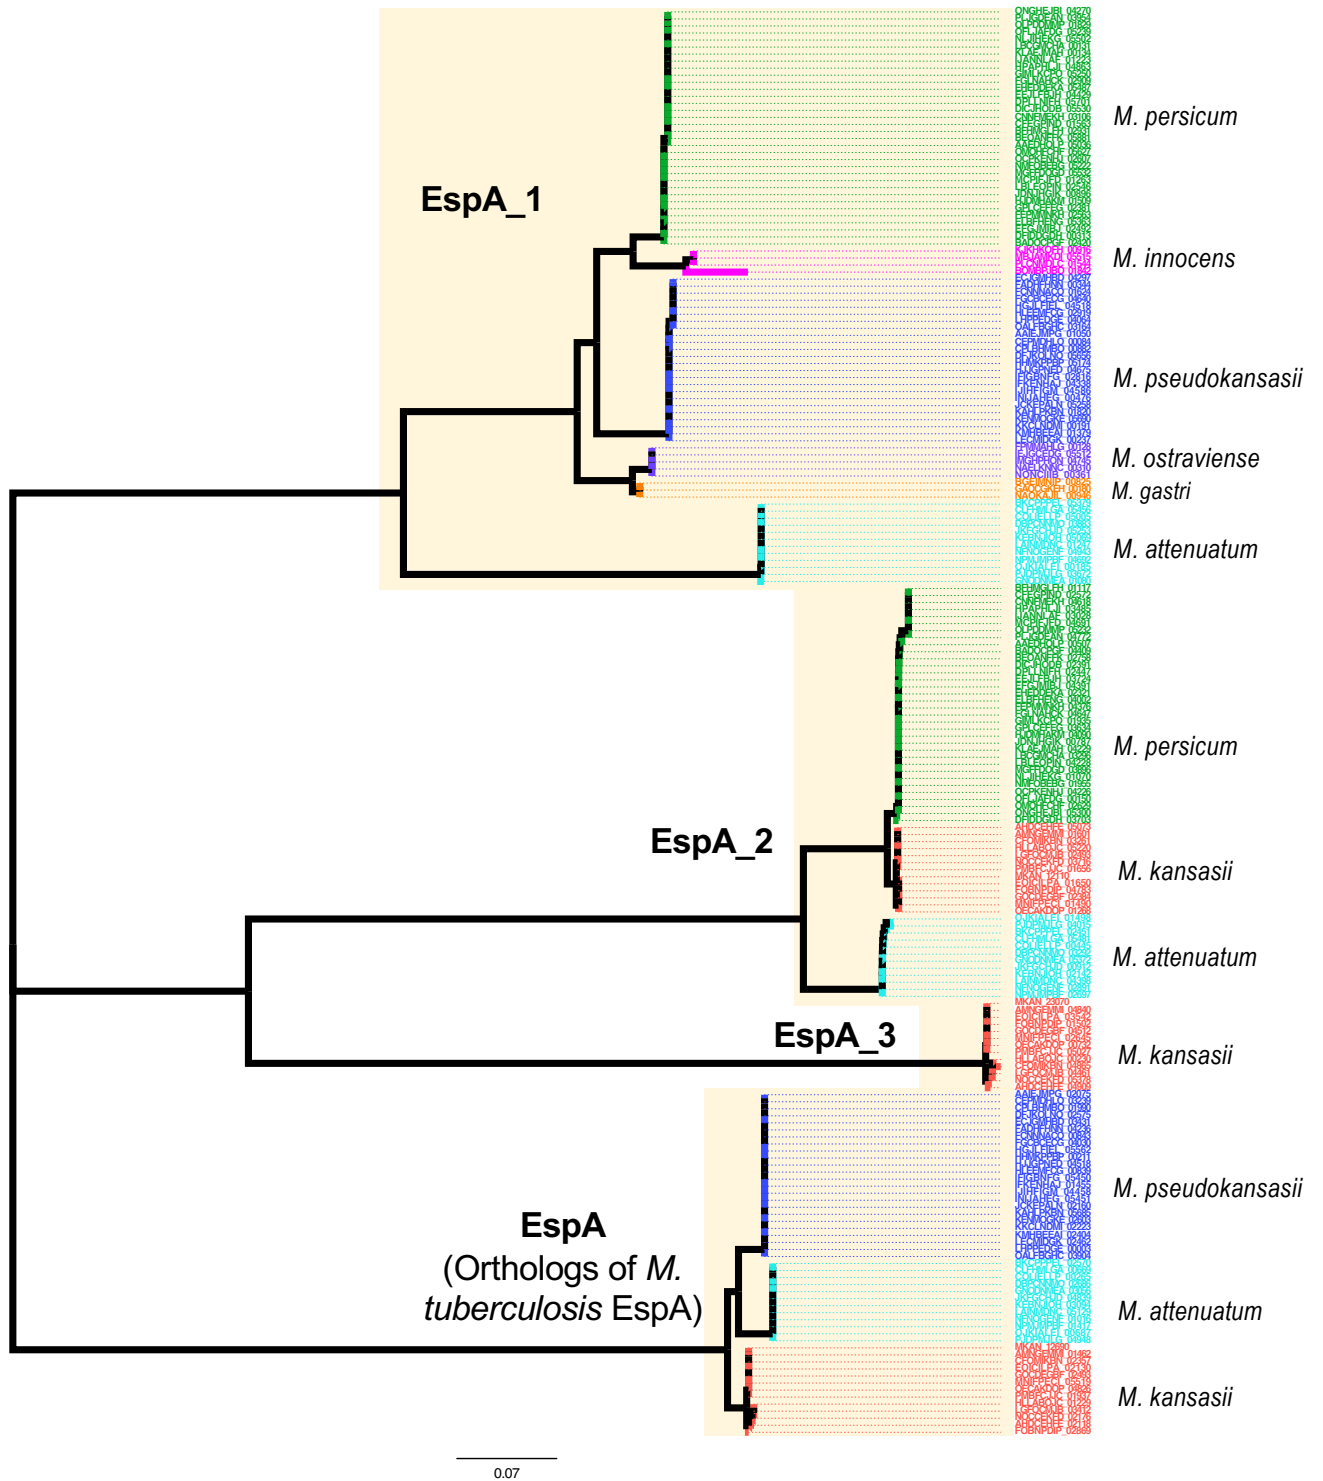

**Supplementary Fig. 15.** The distribution and genetic relationship (Neighbor-Joining phylogeny) of EspA and its paralogs in *M. kansasii* complex. Tip labels are colored to represent genes from different species.



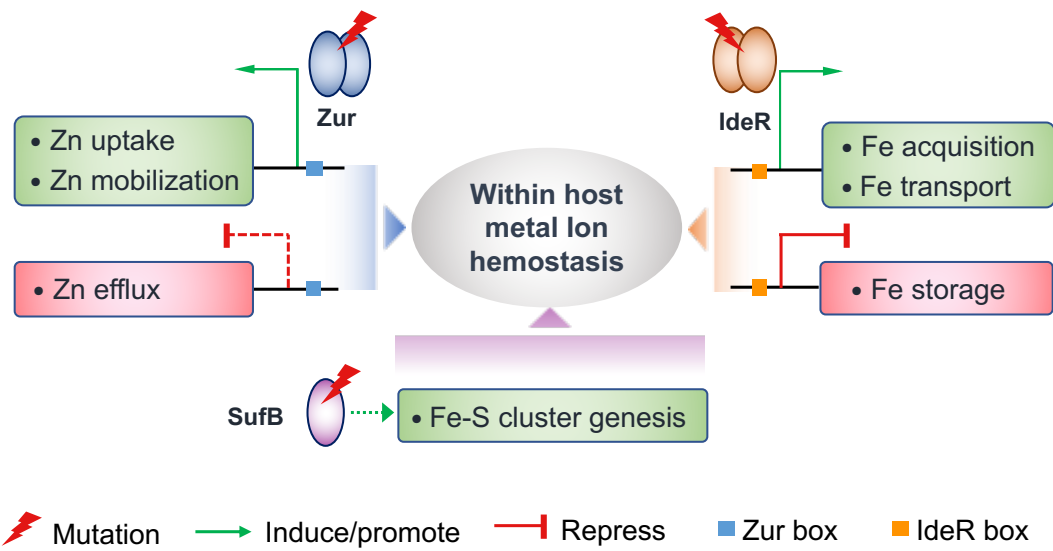

**Supplementary Fig. 16.** Schematic diagram depicting the potential influence of *zur*, *ideR* and *sufB* mutations on the regulation of zinc and iron homeostasis.

**Supplementary Table 1.** Prevalence of *M. kansasii* among nontuberculosis mycobacterium infections in different areas of China <sup>a</sup>.

| Study duration | Province/city | Method for species identification                                              | Number of NTM isolates | Number of <i>M. kansasii</i> isolates | Prevalence of <i>M. kansasii</i> | Reference |
|----------------|---------------|--------------------------------------------------------------------------------|------------------------|---------------------------------------|----------------------------------|-----------|
| 2004-2009      | Shandong      | Sequencing of 16S rRNA                                                         | 68                     | 5                                     | 7.35%                            | 1         |
| 2008-2011      | Heibei        | Sequencing of 16s RNA and ITS                                                  | 95                     | 7                                     | 7.37%                            | 2         |
| 2011-2013      | Hubei         | Sequencing of 16s rRNA and ITS                                                 | 160                    | 2                                     | 1.25%                            | 3         |
| 2008           | Jiangsu       | GenoType CM/AS                                                                 | 60                     | 4                                     | 6.67%                            | 4         |
| 2010-2015      | Beijing       | Sequencing of 16s rRNA and ITS                                                 | 232                    | 23                                    | 9.91%                            | 5         |
| 2005-2012      | Fujian        | multilocus sequence analysis ( <i>rpoB</i> , <i>hsp65</i> and 16-23s rRNA ITS) | 405                    | 1                                     | 0.25%                            | 6         |
| 2005-2012      | Gansu         | multilocus sequence analysis ( <i>rpoB</i> , <i>hsp65</i> and 16-23s rRNA ITS) | 41                     | 0                                     | 0.00%                            | 6         |
| 2012-2014      | Guangdong     | multilocus sequence analysis ( <i>rpoB</i> , <i>hsp65</i> , 16s rRNA and ITS)  | 938                    | 84                                    | 8.96%                            | 7         |
| 2011-2014      | Zhejiang      | Sequencing of <i>hsp65</i>                                                     | 372                    | 36                                    | 9.68%                            | 8         |
| 2012           | Hunan         | Biochip                                                                        | 225                    | 3                                     | 1.33%                            | 9         |
| 2008-2012      | Shanghai      | Sequencing of 16S rRNA                                                         | 616                    | 277                                   | 44.97%                           | 10        |

<sup>a</sup> prevalence of *M. kansasii* in global regions outside China mainland was described in supplementary reference #11.

**Supplementary Table 2.** Mutation profile and morphology of the 12 rough *M. kansasii* clinical isolates and five representative smooth isolates from Shanghai.

| Isolate (species)                 | Mutations in LOS synthesis genes <sup>#</sup>              | Morphology in L-J slant | Colony morphology in 7H10 plate                                                      |
|-----------------------------------|------------------------------------------------------------|-------------------------|--------------------------------------------------------------------------------------|
| 9-1623<br>( <i>M. kansasii</i> )  | <i>pks5</i> Leu369Pro                                      | Rough                   |    |
| 10-280<br>( <i>M. kansasii</i> )  | <i>pks5</i> Ile735fs                                       | Rough                   | NA                                                                                   |
| 10-1065<br>( <i>M. kansasii</i> ) | <i>wbbL2</i> Glu187fs                                      | Rough                   | NA                                                                                   |
| 10-1079<br>( <i>M. kansasii</i> ) | <i>pks5</i> Gly230Glu                                      | Rough                   |  |
| 11-55<br>( <i>M. kansasii</i> )   | <i>fadD25</i> <u>Trp33*</u><br><i>gtf2</i> <u>Thr184fs</u> | Rough                   | NA                                                                                   |
| 11-1085<br>( <i>M. kansasii</i> ) | <i>fadD25</i> Glu288*<br><i>wbbL2</i> Gly91Asp             | Rough                   |  |

|                                   |                                                   |       |                                                                                      |
|-----------------------------------|---------------------------------------------------|-------|--------------------------------------------------------------------------------------|
| 11-1145<br>( <i>M. kansasii</i> ) | <i>fadD25</i> Ser7Arg &<br>Leu8Ser                | Rough | 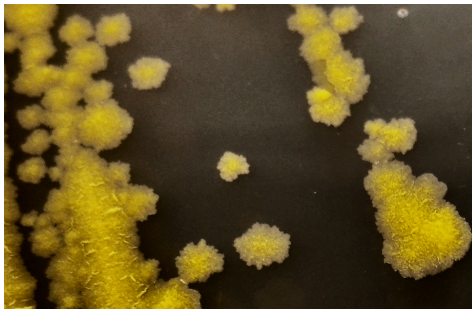   |
| 11-2254<br>( <i>M. kansasii</i> ) | <i>fadD25</i> Val543fs                            | Rough | NA                                                                                   |
| 12-1384<br>( <i>M. kansasii</i> ) | <i>gtf2</i> <u>Tyr202His</u> &<br><u>Cys17Arg</u> | Rough | NA                                                                                   |
| 13-494<br>( <i>M. kansasii</i> )  | <i>gtf1</i> <u>Ser10fs</u>                        | Rough |   |
| 13-934<br>( <i>M. kansasii</i> )  | <i>gtf1</i> Glu381fs                              | Rough |  |
| 13-2434<br>( <i>M. kansasii</i> ) | <i>pks5</i> Tyr335His                             | Rough |  |

|                                         |          |               |                                                                                      |
|-----------------------------------------|----------|---------------|--------------------------------------------------------------------------------------|
| <p>9-1581<br/>(<i>M. kansasii</i>)</p>  | <p>-</p> | <p>Smooth</p> |    |
| <p>10-114<br/>(<i>M. kansasii</i>)</p>  | <p>-</p> | <p>Smooth</p> |    |
| <p>10-1523<br/>(<i>M. kansasii</i>)</p> | <p>-</p> | <p>Smooth</p> |   |
| <p>13-2184<br/>(<i>M. kansasii</i>)</p> | <p>-</p> | <p>Smooth</p> |  |
| <p>13-2204<br/>(<i>M. persicum</i>)</p> | <p>-</p> | <p>Smooth</p> |  |

#Underlines indicate unfixed (heterozygous) mutations.

## Supplementary References

1. Jing, H. *et al.* Prevalence of nontuberculous mycobacteria infection, China, 2004-2009. *Emerg Infect Dis* **18**, 527-8 (2012).
2. Wang, X. *et al.* Prevalence and drug resistance of nontuberculous mycobacteria, northern China, 2008-2011. *Emerg Infect Dis* **20**, 1252-3 (2014).
3. Yu, X.L. *et al.* Identification and characterization of non-tuberculous mycobacteria isolated from tuberculosis suspects in Southern-central China. *PLoS One* **9**, e114353 (2014).
4. Shao, Y. *et al.* The epidemiology and geographic distribution of nontuberculous mycobacteria clinical isolates from sputum samples in the eastern region of China. *PLoS Negl Trop Dis* **9**, e0003623 (2015).
5. Duan, H. *et al.* Clinical Significance of Nontuberculous Mycobacteria Isolated From Respiratory Specimens in a Chinese Tuberculosis Tertiary Care Center. *Sci Rep* **6**, 36299 (2016).
6. Liu, H. *et al.* Identification of Species of Nontuberculous Mycobacteria Clinical Isolates from 8 Provinces of China. *Biomed Res Int* **2016**, 2153910 (2016).
7. Pang, Y. *et al.* Diversity of nontuberculous mycobacteria in eastern and southern China: a cross-sectional study. *Eur Respir J* **49**, 1601429 (2017).
8. Pan, A. *et al.* Analysis of pathogen spectrum of nontuberculosis Mycobacteria in Zhejiang province, *Chinese Journal of Health Laboratory Technology* (In Chinese) **25**, 4298-430 (2015)
9. Qi, Z. *et al.* Gene chips typing and drug sensitivity analysis of 225 cases of non-tuberculous mycobacteria. *Journal of clinical pulmonary medicine* (In Chinese) **19**, 105-107 (2014).
10. Wu, J. *et al.* Increase in nontuberculous mycobacteria isolated in Shanghai, China: results from a population-based study. *PLoS One* **9**, e109736 (2014).
11. Hoefsloot, W. *et al.* The geographic diversity of nontuberculous mycobacteria isolated from pulmonary samples: an NTM-NET collaborative study. *Eur Respir J* **42**, 1604-13 (2013).
