# Supplementary material for: Population genomics provides insights into the evolution and adaptation to humans of the waterborne pathogen Mycobacterium kansasii
Source: PubMed Central journal article supplement (PMC8093194; doi:10.1038/s41467-021-22760-6), 2021-05-03
Supplement: 41467_2021_22760_MOESM3_ESM.pdf [file 41467_2021_22760_MOESM3_ESM.pdf]

## **Description of Additional Supplementary Files**

File Name: Supplementary Data 1

Description: Metadata for the isolates included in this study.

File Name: Supplementary Data 2

Description: Information for the 146 genes specific to *M. kansasii*.

File Name: Supplementary Data 3

Description: Non-synonymous mutations in genes under potential positive selection.
